|    |                                                                                              |    |
|----|----------------------------------------------------------------------------------------------|----|
| 1  | TITLE.....                                                                                   | 2  |
| 2  | Abstract .....                                                                               | 2  |
| 3  | Introduction .....                                                                           | 3  |
| 4  | Material & Methods .....                                                                     | 5  |
| 5  | Experimental design and field treatment.....                                                 | 5  |
| 6  | Microbial DNA collection, extraction and sequencing .....                                    | 5  |
| 7  | Sequence processing & computation.....                                                       | 7  |
| 8  | Data analysis.....                                                                           | 8  |
| 9  | <i>P. syringae</i> abundance analysis on squash leaves .....                                 | 8  |
| 10 | Differential abundance analysis of ASVs.....                                                 | 9  |
| 11 | Results .....                                                                                | 10 |
| 12 | Cover cropping reduced <i>P. syringae</i> abundance on squash leaves .....                   | 10 |
| 13 | Phyllosphere microbial communities differed among sampling date and treatments .....         | 11 |
| 14 | Cover cropping treatments influence squash phyllosphere communities.....                     | 12 |
| 15 | Differentially abundant taxa among treatments at each sampling date: <i>Sphingomonas</i> and |    |
| 16 | <i>Methylobacterium</i> are more abundant with cover crop treatments .....                   | 13 |
| 17 | Discussion .....                                                                             | 14 |
| 18 | Conclusion.....                                                                              | 17 |
| 19 | Funding.....                                                                                 | 18 |
| 20 | References .....                                                                             | 19 |

22 **TITLE**

23 Winter rye cover cropping changes squash (*Cucurbita pepo*) phyllosphere  
24 microbiota and reduces *Pseudomonas syringae* symptoms

25 Rémi Maglione<sup>1,2</sup>, Marie Ciotola<sup>1</sup>, Mélanie Cadieux<sup>1</sup>, Vicky Toussaint<sup>1</sup>, Martin Laforest\*<sup>1</sup>, Steven  
26 W. Kembel\*<sup>2</sup>

27 <sup>1</sup> Research and Development Centre, Agriculture and Agri-Food Canada, Saint-Jean-sur-Richelieu  
28 (QC, Canada)

29 <sup>2</sup> Département des sciences biologiques, Université du Québec à Montréal (QC, Canada)

30 \* Corresponding authors: [kembel.steven\\_w@uqam.ca](mailto:kembel.steven_w@uqam.ca), [martin.laforest@canada.ca](mailto:martin.laforest@canada.ca)

31 **Abstract**

32 Cover cropping is a soil conservation practice that may reduce the impacts of the economically  
33 important pathogen *Pseudomonas syringae* on crops including squash (*Cucurbita pepo*). To date,  
34 no studies have directly quantified the effect of rye cover crops on *P. syringae* populations, nor on  
35 the bacterial community of squash leaves. In this work, we tested the hypothesis that the protective  
36 effects of cover cropping on squash may be mediated by cover cropping effects on the plant's  
37 microbiota that in turn protects against *P. syringae*. Using combined 16S sequencing and culture-  
38 based approaches, we showed that rye cover cropping protects squash against *P. syringae*, by  
39 decreasing pathogen population size on squash leaves and increasing fruit health and marketability  
40 at harvest. We also found evidence of a strong effect of rye cover crops on bacterial communities  
41 of the squash phyllosphere. Those findings were more striking early in the growing season. Finally,  
42 we identified numerous phyllosphere bacteria belonging to the genera *Sphingomonas*,  
43 *Methylobacterium* and *Pseudomonas* that were promoted by rye cover crops. Overall, our findings

44 suggest cover cropping is effective for the sustainable management of *P. syringae* on squash and  
45 may provide a reservoir of potential microbial biocontrol agents colonizing the phyllosphere.

## 46 **Introduction**

47 Cover cropping, or the growth of a plant to cover the soil for environmental benefits rather than for  
48 its harvest, is an increasingly popular option available to farmers to address the environmental and  
49 human health challenges associated with agricultural intensification (1). Cover cropping allows  
50 equivalent yield (2) or an increase in yield (3–5), weed control (6), nematode control (7), and  
51 reduces soil erosion (5,8). Winter cover crops used in northern countries are a promising avenue to  
52 reduce soil erosion and depletion by covering the soil during the winter (8). Cover crops can also  
53 improve water quality by reducing herbicide runoffs (9), and improve soil condition by reducing  
54 temperature variations and water loss (10). Cover cropping is known to shape the soil microbiome  
55 (11), but to date no study has quantified cover crop effects on aboveground microbial communities.

56 The phyllosphere microbiome, the microbial communities of aboveground plant parts, particularly  
57 leaves, are composed of a broad range of microorganisms such as bacteria, viruses, fungi and  
58 archaea (12). The microbiota on the aboveground parts of plants can improve plant fitness and  
59 biomass, primarily by reducing pathogen symptoms thanks to direct competition or associated with  
60 plant volatile compound (13,14). Microorganisms are also important pathogens of the  
61 phyllosphere: 20–30% of crop production losses worldwide are due to various pests and pathogens  
62 (15), and microscopic pathogens are estimated to account for 16% of losses (16). *Pseudomonas*  
63 *syringae*, one of the most widely studied bacterial plant pathogens, can infect a wide range of host  
64 plants including many economically important crops: it begins life as a leaf epiphyte and colonizes  
65 the host apoplast through wounds and stomates (reviewed in 17 and 18). Long-term intensive and  
66 frequent monocropping favour emergence of local pathogenic *P. syringae* reservoir (19). Efforts  
67 have been made to biologically control this pathogen on leaves using microbial competition:  
68 Linderman et al. (1987) used a competition population of *P. syringae* disarmed with an ice

69 nucleation mutation to prevent pathogen-related frost damage on strawberry plants and Innerebner  
70 et al. (2011) used several *Sphingomonas* species on leaf surfaces to protect *Arabidopsis thaliana*  
71 plants from *P. syringae*. Moreover, many studies of plant induced systemic resistance (ISR) have  
72 noted potential leaf control of *P. syringae* based on the microbe-associated molecular patterns  
73 (MAMPs) mechanism and, interestingly, via microbial competitors located in the root-associated  
74 microbiome (reviewed in 22 and 23). For instance, Hossain et al. (2008) applied plant growth-  
75 promoting fungi *Penicillium sp.*, isolated from soil, to promote tomato ISR against the leaf  
76 pathogen *P. syringae* pv. *tomato* DC3000.

77 Despite the potential for microbiota-based biological control of *P. syringae*, management of this  
78 pathogen is primarily done through copper applications, which has led to the development of  
79 resistance (25). Past studies have suggested that cover crops may provide soil borne biological  
80 control of pathogens (26–28), and we have found that rye cover crops helped to reduce *P. syringae*  
81 symptoms incidence on squash leaves (Toussaint et al., personal communication). The mechanism  
82 of this protective effect of rye cover crops against squash bacterial leaf spot is not known, but we  
83 hypothesize that it may be mediated by cover cropping effects on the plant's microbiota that in turn  
84 protects against *P. syringae*.

85 In this study we used sequence and culture-based approaches to quantify the effects of different  
86 cover cropping approaches on bacterial communities on squash leaves infected by *P. syringae*. We  
87 first evaluated if cover crops could help to reduce *P. syringae* populations on squash leaf surfaces  
88 by direct measurement of pathogen abundance on leaves. We also considered the fruit's health and  
89 marketability at harvest in such cropping practices. We then estimated the effects of different cover  
90 cropping methods on phyllosphere bacterial communities by quantifying leaf microbiome diversity  
91 and composition using a bacterial metabarcoding approach. Finally, we identified the bacterial taxa  
92 that were most strongly influenced by cover cropping practices.

93

## 94 **Material & Methods**

### 95 Experimental design and field treatment

96 All samples in this study were collected from the Agriculture and Agri-Food Canada L'Acadie  
97 Experimental Farm at Saint-Jean-sur-Richelieu, Quebec, Canada (45°17'48.7"N 73°20'14.8"W).  
98 The experiment comprised 6 replicates of 4 cover cropping treatments in a fully randomized block  
99 design, with a total of 24 plots containing 3 raised beds with a single line of squash each (see  
100 Supplemental Figure 1). The cover cropping treatments were Rye (*Secale cereale*) Cover Crop  
101 (RCC), Chemically Terminated Rye Cover Crop (CT-RCC), Plastic Cover (PC) and Bare Soil (BS).  
102 Specifically, for 2016 and 2017 growing season, the RCC treatment consisted of fall rye (cv  
103 Gauthier) seeded at a rate of 250kg/ha on September 14<sup>th</sup> 2015 and September 16<sup>th</sup> 2016 and rolled  
104 to the ground the following spring by crimping rye with a 3-sectional roller crimper(I&J Mfg., PA,  
105 USA) on June 13<sup>th</sup> 2016/2017; the CT-RCC treatment was the same as RCC except rye was killed  
106 with an herbicide (glyphosate (Roundup, WeatherMaxMD, Bayer, Canada) at a rate of 2.16 kg a.e.  
107 ha<sup>-1</sup>) before the rye crimping; the PC treatment consisted in the application of an agricultural plastic  
108 mulch over each raised bed within plots; and the BS treatment was a bare soil mound lane that did  
109 not receive any cover cropping treatment. To monitor treatment effects on pathogen populations,  
110 we inoculated squash seeds with a rifampicin-resistant *P. syringae* strain prior to direct seeding  
111 into raised beds. The strain pathogenicity was confirmed by hypersensitive reaction (HR) testing  
112 in tobacco leaves and seed inoculation was validated by growing on-field control plants at the  
113 border of each treatment plot.

### 114 Microbial collection, DNA extraction and sequencing

115 Microbial communities of the phyllosphere were collected from squash at three different times each  
116 growing season in 2016 (12 July, 1 August and 1 September), and 2017 (12 June, 31 July and 5  
117 September), as defined as *Early, Mid and Late* season. Each sample consisted of a mix of young  
118 and old leaves harvested from the squash canopy by clipping an average of 16.8±8.3 g and 20.7±4.8

119 g of leaves for years 2016 and 2017 respectively (see Supplemental Table 3) from an individual  
120 plant into sterile sample bags (SCR-7012-ID, Innovation Diagnostics Inc., Blainville, Canada) with  
121 surface-sterilized shears. Replicate samples (3 per plot) were collected for a total of 72 samples per  
122 sampling date (3 samples x 4 treatments x 6 replicates). Microbial cells were then gathered by  
123 washing each leaf sample using with 110 ml of saline buffer [10% NaCl] and using a homogeniser  
124 blender (Stomacher® 400, Seward, UK) for 30 sec at 250 rpm.

125 A volume of 1ml of wash solution from each sample was placed on King's B (KB) medium with  
126 cycloheximide (50mg/l) (C7698, Sigma Aldrich, Oakville, CA) and rifampicin (50mg/l) (R3501,  
127 Sigma-Aldrich, Oakville, CA), allowing us to estimate *P. syringae* population size by counting  
128 colony forming units CFU after 4 days of growth at 28 C°. Specifically, pathogen counts were  
129 calculated as:

$$130 \quad (CFU \text{ counts} * \text{volume of saline buffer}(ml)) / (\text{dilution} * \text{leaf sample weigh}(g) * 0.01)$$

131 The remaining 100 ml wash solution was divided into two 50ml Falcon tubes; one was centrifuged  
132 at 11,500 × g for 20 min and the other at 4,500 × g for 20 min. The aqueous phase was removed  
133 from both tubes and the pellet in the Falcon tube centrifuged at 4,500 × g was frozen at -80°C. The  
134 DNA of the remaining pellet was extracted using MoBio PowerSoil DNA extraction kits (CA-  
135 11011-418, VWR, Mont-Royal, CA) and stored at -20°C for future processing. Amplicon libraries  
136 were prepared for Illumina sequencing using PCR targeting the V5–V6 region of the bacterial 16S  
137 rRNA gene using cyanobacteria-excluding primers [16S primers 799F-1115R] (29,30) to exclude  
138 chloroplast DNA (for a 16S amplicon structure overview, see supplemental Figure 2). The 25  
139 microliter PCR reactions consisted of 5 µL 5x HF buffer (Thermo Scientific, Waltham, MA, USA),  
140 0.75 µL DMSO, 0.5 µL dNTPs (10 mM each), 0.25 µL Phusion Hot Start II polymerase (Thermo  
141 Scientific), 1 µL each primer (5 µM), 1 µL of genomic DNA, and 15.5 µL molecular-grade water  
142 (IDT, Coralville, IA, USA). We included, onto the libraries, a negative control (1µl of sterile water;  
143 IDT, Coralville, IA, USA) as well as a positive control (1µl of *P. syringae* DNA) was included in

144 each 96 well library plate. Libraries were checked on Agarose gels (2%), normalized with  
145 SequalPrep kit (A1051001, Life Technologies, Burlington, CA) on a Gilson robot ([Middleton, WI](#),  
146 USA) and sequenced on a MiSeq (Illumina, San Diego, CA, USA). For each ear, samples were  
147 randomly assigned between two sequencing runs, representing a total of 4 runs.

#### 148 Sequence analysis

149 Sequencing adaptors were removed with the bbdduk tool from bbmap (38.86,  
150 <https://sourceforge.net/projects/bbmap/>), with the following parameters: ktrim=r k=23 mink=11  
151 hdist=1 tpe tbo (31). Sequences were thereafter demultiplexed allowing one mismatch on the  
152 barcode sequence with deMulMe ([https://github.com/RemiMaglione/](https://github.com/RemiMaglione/genomicScript/tree/master/deMulMe)  
153 [genomicScript/tree/master/deMulMe](https://github.com/RemiMaglione/genomicScript/tree/master/deMulMe)). Sequence barcodes were removed with cutadapt 2.10 in  
154 paired-end mode (32). In total we obtained 11,929,677 and 11,816,138 demultiplexed paired-end  
155 sequences, for 2016 and 2017 respectively. All subsequent data processing and computations were  
156 done with DADA2 1.12.1 (33) in R 3.6.0 (RC Team, 2013) and graphs were produced using the  
157 ggplot2 3.2.1 package (36) Sequences were trimmed and quality filtered with *filterAndTrim* with  
158 default parameters except: trimLeft = c(19, 26), truncLen = c(230, 210), maxEE=c(2,3); *trimleft*  
159 was set to remove both PCR primers and barcodes used for libraries preparation, *truncLen* and  
160 *maxEE* were set to yield filtered sequences with a quality around a phred score of 30. Amplicon  
161 sequence variants (ASVs) were constructed from filtered sequences with the following set of built-  
162 in DADA2 functions and their default parameters except as mentioned: *dada* in pseudo-pooling  
163 mode, *mergePairs* with minOverlap = 30, *collapseNoMismatch* with minOverlap = 240,  
164 *removeBimeraDenovo* with method="pooled". ASVs were then taxonomically annotated by  
165 *assignTaxonomy* with SILVA version 128 database (37,38). For 2016 and 2017 data, the DADA2  
166 pipeline yielded a mean of 10,484,056 filtered paired-end sequences used to identify 7,604 ASVs,  
167 which represent an average of 29,652 sequences and 165 ASVs per sample.

168 A preliminary evaluation of positive and negative control samples was performed with a principal  
169 component analysis ordination of a distance matrix obtained with centred log ratio (clr)  
170 transformation of the original community matrix (39). Since control samples would be lost by  
171 excluding samples with very few sequences, the clr transformation allowed us to keep all the  
172 samples while identifying outlier samples. Since the control samples were distinct compositionally  
173 from the squash samples (see Supplemental Figure 3), they were removed for all further analyses.

174 Data analysis

175 *P. syringae* abundance analysis on squash leaves

176 Since no significant differences in *P. syringae* abundances among experimental blocks were  
177 observed in 2016, therefore, *P. syringae* count differences between treatments were evaluated with  
178 a linear model of treatment effects on *P. syringae* abundance. In 2017, effects of experimental  
179 blocks on *P. syringae* abundances were significant and were thus integrated in a mixed linear model  
180 of treatment effects on abundances as a random effect. Effect of treatment was estimated with a  
181 TukeyHSD post-hoc test performed on the above-mentioned model.

182 Squash fruit health and marketability at harvest

183 We quantified squash fruit health and marketability by harvesting fruit within a 10m x 10m area  
184 within each plot. Fruit health and marketability was determined with 4 categories of *P. syringae*  
185 symptoms based on the visually estimated proportion of fruit affected by the considered symptoms:  
186 *P.syringae* symptoms outside of the fruits, *P.syringae* symptoms that penetrate the fruits,  
187 *P.syringae* symptoms that let a scare at the surface of the fruits and *P.syringae* symptoms that  
188 generate squash rot. Marketability has been assessed from each categories of *P. syringae* symptoms  
189 where more than 1% of fruit affected in at least one category prevent marketability. Healthy fruit  
190 was defined as a squash fruit with no *P. syringae* symptoms. Thus, marketability and fruit health  
191 were binomially distributed and their differences among treatments were evaluated with



192 generalized mixed linear model, where blocking effect was integrated as random variable, for both  
193 years, except marketability in 2016 where blocking effect was not significant and treatment effect  
194 was modeled with generalized linear model. Effects of treatment on fruit health and marketability  
195 was estimated with a TukeyHSD post-hoc test (using the *glht* function of *multcomp* R package)  
196 performed on the above-mentioned model.

197 Effect of cover cropping treatments on bacterial community diversity

198 Diversity analyses were performed using the R package phyloseq 1.30.0 (40), picante 1.8.1 (41),  
199 and vegan 2.5-6 (34). To evaluate the effect of treatments on community diversity on squash leaves,  
200 samples were randomly rarefied to 5000 sequences per sample: this threshold was chosen to  
201 preserve the maximum number of samples with a sufficient quantity of ASVs to capture the  
202 majority of the diversity in each sample (see Supplemental Figures 4 and 5). For all diversity  
203 analyses, rarefactions and their subsequent analyses were repeated 1000 times but no qualitative  
204 differences were observed between iterations, and so we report here the results of a single random  
205 rarefaction of the data. The uniformity of relative abundance distributions of ASVs (alpha diversity)  
206 was assessed with the Shannon index (42). The effect of treatment on alpha diversity was evaluated  
207 with a post-hoc test (TukeyHSD) of a linear model (alpha diversity as a function of treatment).  
208 Variation in bacterial community structure among samples was quantified with the Bray-Curtis  
209 index (43). Major gradients in community composition were evaluated with nonmetric  
210 multidimensional scaling (NMDS) ordination of weighted Bray-Curtis distances among samples.  
211 We partitioned the variance in phyllosphere bacterial community structure explained by sampling  
212 date and treatment using generalized mixed model and permutational ANOVA analysis of the  
213 variance in Bray-Curtis distances. We tested sample clusters of two compositionally distinct groups  
214 of treatment with a least squares comparison between treatment and the two NMDS axis scores,  
215 with the emmeans v1.4.8 R package (44).

216 Differential abundance analysis of ASVs

217 Differential abundance analysis of ASVs among treatments were performed with DeSeq2 3.11 (45).  
218 The ASV matrix was filtered using the CoDaSeq R package 0.99.4 (46), with the *codaSeq.filter*  
219 function with the following parameters: *min.reads*=1000 (minimum reads per sample),  
220 *min.prop*=0.00001 (minimum proportional abundance of a read in any sample),  
221 *min.occurrence*=0.005 (minimum fraction of non-zero reads for each variable in all samples). Then,  
222 zero counts from the filtered matrix were substituted with the Bayesian-multiplicative replacement  
223 of zero counts approach included in the *cmultRepl* function from the *zCompositions* R package  
224 (47). Since DeSeq2 takes non-zero positive integers as input, we adjusted the values of the zero-  
225 replaced matrix (*mv*) so that the lowest value is equal to 1 with:  $mv + (1 - \min(mv))$ . DeSeq2 analysis  
226 was executed with parameters recommended for single-cell analysis that better fit data with a zero-  
227 inflated negative binomial distribution such as our modified community matrix. We tested for  
228 differential abundance by contrasting ASV abundances across all six possible treatment  
229 comparisons: Rye Cover Crop versus Chemically Terminated-Rye Cover Crop, Rye Cover Crop  
230 versus Plastic Cover, Rye Cover Crop versus Bare Soil, Chemically Terminated-Rye Cover Crop  
231 versus Plastic Cover, Chemically Terminated-Rye Cover Crop versus Bare Soil and Plastic Cover  
232 versus Bare Soil. We used the following model:  $design = \sim block + treatment$  and the blocking  
233 random variable was controlled through the *reduced* parameter. Only contrasts with *adjusted P-*  
234 *value*  $\leq 0.01$  and *log<sub>2</sub>-fold-change*  $\geq 1$  were considered to be significantly differentially abundant.

235

## 236 **Results**

237 Cover cropping reduced *P. syringae* abundance on squash leaves and improved fruit  
238 health and marketability.

239 We found that *P. syringae* was less abundant on the leaves of squash grown with rye cover crops  
240 (Figure 1) and harvested squash fruits was more marketable and healthier with rye treatments  
241 (Table 1). In 2016, *P. syringae* CFU counts were significantly lower for the Rye Cover Crop

242 treatment compared to Plastic Cover and Bare Soil treatments during the *Early* season (Tukey HSD  
243 post-hoc on linear model; Figure 1). There were no significant differences among treatments during  
244 *Mid* and *Late* season sampling in 2016. On the other hand, in 2017, *P. syringae* CFU counts were  
245 significantly lower during the *Early* season for both rye cover crop treatments (Rye Cover Crop  
246 and Chemically-Terminated Rye Cover Crop) compared to Plastic Cover and Bare Soil treatments  
247 (Tukey HSD post-hoc test on linear mixed model; Figure 1). No *P. syringae* colonies were retrieved  
248 at *Mid* season on the squash leaves grown with rye cover crops, and pathogen populations were  
249 lower for Chemically-Terminated Rye Cover Crop as compared to Plastic Cover and Bare Soil  
250 treatments. Finally, pathogen CFUs were significantly lower between Rye Cover Crop and Bare  
251 Soil at *Late* season sampling. Thus, *P. syringae* populations were significantly lower with rye cover  
252 cropping during the entire 2017 growing season. Taken together, *P. syringae* populations showed  
253 the greatest reduction in the rye cover crop treatments early in the growing season. This finding is  
254 consistently supported across the two years of the experiment (see Supplemental Table 1 and 2).  
255 Moreover, fruits health and marketability were significantly different across all year of harvest  
256 ( $p < 0.05$ ). Indeed, marketability with Rye Cover Crop was significantly different from Bare soil and  
257 Plastic Cover with an average marketability increase of, as compare to Bare Soil, 13% in 2016 and  
258 6.17% in 2017, and as compare to Plastic Cover, 8% in 2016 and 4.33% in 2017 (Table 1). Fruit  
259 health enjoy an increase of 14% in 2016 with Rye Cover Crops treatment as compare to Bare Soil  
260 and 7.17% in 2017 with Chemically-Terminated Rye Cover Crop treatment as compare to Bare  
261 Soil (Table 1). No further significant differences were overserved for fruits health and marketability  
262 in both year of harvest.

263 Phyllosphere microbial communities differed between sampling dates and treatments  
264 Cover cropping treatments influenced bacterial community composition on squash leaves.  
265 Treatments also affect bacterial diversity and richness (see Supplemental Analysis 1 with  
266 Supplemental Figures 6 & 7). A nonmetric multidimensional scaling ordination of the overall

267 community distance matrix suggests that squash phyllosphere samples clustered by sampling dates  
268 in both years (see Supplemental Figure 8); sampling date accounted for 28% ( $R^2 = 0.28$ ,  $p < 0.001$ )  
269 and 11% ( $R^2 = 0.11$ ,  $p < 0.001$ ) of community compositional variation between samples for 2016  
270 and 2017 respectively (PERMANOVA on Bray-Curtis distances among samples). Because there  
271 was an interaction between sampling date and treatments (PERMANOVA on Bray-Curtis distances  
272 among samples; sampling date \* cover crop treatment interaction  $P < 0.001$  both years), and  
273 sampling date accounted for the majority of the effect, we thus analyzed the effect of treatments on  
274 communities separately for each date in order to summarize these complex effects.

#### 275 Effect of treatments on community diversity

276 Bacterial community alpha diversity was significantly different among treatments for several  
277 sampling dates (linear model; Shannon diversity vs. cover cropping treatment,  $P < 0.05$ ; Figure 2).  
278 Bacterial community alpha diversity was higher for both rye treatments as compared to bare soil  
279 and plastic treatments in 2016 in the *Early* season sampling (Tukey HSD on linear model; Figure  
280 2). No further differences were observed between treatments at the other sampling dates in 2016.  
281 Although both rye cover cropping practices resulted in significantly lower Shannon diversity in  
282 *Mid* season sampling as compared to Bare Soil, their alpha diversity was higher as compared to  
283 plastic treatments in *Early* season sampling. No further differences were observed between  
284 treatments in late season sampling of 2017. Taken together alpha diversity increased early in the  
285 growing season for both rye cover cropping treatments as compared to bare soil and plastic  
286 treatments of 2016 or to the plastic treatment of 2017.

#### 287 Cover cropping treatments influence squash phyllosphere communities

288 Community composition varied among cover cropping treatments for each sampling date of 2016  
289 and 2017 (PERMANOVA on Bray-Curtis distances for each sampling date; cover cropping effect  
290  $P < 0.001$ ). Moreover, distances between treatment clusters for the ordination (Figure 3) suggests  
291 that treatment effects were more important for *Early* season sampling as compared to the other

292 sampling dates. Differences in community composition among treatments were more pronounced  
293 in *Early* (PERMANOVA on Bray-Curtis distances; effect of cover cropping treatment  $P_{2016 \& 2017} < 0.001$ ;  $R^2_{2016} = 0.24$ ,  $R^2_{2017} = 0.31$ ) rather than *Mid* ( $P_{2016 \& 2017} < 0.001$ ;  $R^2_{2016} = 0.14$ ,  $R^2_{2017} = 0.30$ )  
294 and *Late* season sampling ( $P_{2016 \& 2017} < 0.001$ ;  $R^2_{2016} = 0.07$ ,  $R^2_{2017} = 0.16$ ) (Figure 3).

296 Ordination of samples based on community composition also indicated that samples clustered into  
297 two compositionally distinct groups: Rye and Chemically-Terminated Rye Cover Cropping, versus  
298 Plastic and Bare Soil (Figure 3). At each sampling date, sample scores on the first axis of ordination  
299 differed significantly between cover cropping treatments. Rye and Chemically-Terminated Rye  
300 were different from the Plastic and Bare Soil, but not different from each other (linear mixed model  
301 with blocking variable as random effect and Tukey HSD on linear mixed model; ordination axis  
302 scores versus cover cropping treatment; Supplemental Figure 9). Moreover, according to the Tukey  
303 HSD, these two compositionally distinct groups (Rye and Chemically-Terminated Rye versus  
304 Plastic and Bare Soil) are more different during the *Early* season as compared to every other  
305 sampling date. This difference remains, although it progressively decreases, throughout the  
306 growing season. However, plastic and bare soil seem to not share this behavior, and those  
307 treatments were different in *Mid* season in 2017 and were often separated along the second axis of  
308 the NMDS ordination (Figure 3; estimated marginal means test of ordination axis scores;  
309 Supplemental Figure 9). Taken together, both rye treatments have a similar effect on the  
310 phyllosphere bacterial community structure as compared to plastic and bare soil. This effect was  
311 present during the entire growth period but was more pronounced early in the growing season.

312 Differentially abundant taxa among treatments at each sampling date: *Sphingomonas*  
313 and *Methylobacterium* were more abundant with cover crop treatments.

314 An analysis of differential abundance of ASVs among treatments and sampling dates identified  
315 several ASVs that were more abundant in certain treatments and at certain times. As mentioned  
316 previously, the cover crop effect on taxa abundance was analyzed separately for each sampling date

317 because the abundance of *P. syringae* and the squash phyllosphere communities were also  
318 influenced by the date when the sampling occurred, differences being more important earlier in the  
319 season. To identify ASVs that were strongly associated with different cover cropping systems we  
320 took the top differentially abundant ASVs with the highest log<sub>2</sub>-fold change in abundance for each  
321 treatment comparison (2017: Figure 4, 2016: Supplemental Figure 10). Different cover cropping  
322 treatments had several differentially abundant ASVs with log<sub>2</sub>-fold changes in abundance between  
323 treatments ranging from -10.2 to 9.7. Overall, the contrasts of Rye versus Chemically-Terminated  
324 Rye, and Plastic versus Bare Soil consistently had fewer and weaker differentially abundant ASVs  
325 in comparison with the contrasts between these two groups. In 2016, ASVs that were significantly  
326 more abundant for Rye and Chemically-Terminated Rye Cover Crop treatments included those  
327 annotated at the genus level as *Rhizobium*, *Pseudomonas* and *Saccharibacillus* during the *Early*  
328 season, and *Chryseobacterium* and *Sphingomonas* during the *Mid* season. Conversely, ASVs that  
329 were significantly more abundant in Bare Soil and Plastic Cover treatments included those  
330 annotated as *Pseudoatrobacter* during the *Early* season, *Exiguobacterium* and *Pseudoatrobacter*  
331 during the *Mid* season, and *Deinococcus* during the *Late* season. In 2017, ASVs that were  
332 significantly more abundant for Rye and Chemically-Terminated Rye Cover Crop treatments  
333 included those annotated as the genera *Sphingomonas*, *Methylobacterium* or *Hymenobacterium*  
334 during the *Early* season, *Sphingomonas*, *Methylobacterium*, *Aureimonas* and *Microbacterium*  
335 during the *Mid* season, and *Chryseobacterium* and *Rhizobacterium* during the *Late* season. On the  
336 other hand, ASVs that were significantly more abundant in Bare Soil and Plastic Cover treatments  
337 included, *Massila* and *Exiguobacterium* at *Early* season, *Massila*, *Exiguobacterium*,  
338 *Hymenobacter*, *Deinococcus* and *Pseudoatrobacter* at *Mid* season and *Deinococcus* and  
339 *Microbacterium* at *Late* season.

## 340 **Discussion**

341 Rye cover cropping reduced the abundance of *P. syringae* on squash leaves, improved the health  
342 and marketability of fruit, and shaped phyllosphere bacterial community composition and diversity.  
343 The greatest effect of cover cropping on both the phyllosphere community and *P. syringae*  
344 abundance was observed early in the growing season. *P. syringae* begins life on leaves as an  
345 epiphyte but then must colonize host tissue through stomata or wounds (48). Disease severity could  
346 be lowered if the early establishment and survival of *P. syringae* is jeopardized. Taken together our  
347 results suggest that cover cropping treatments induce both shifts in phyllosphere microbiota and a  
348 protective effect against *P. syringae*, by reducing leaf pathogen abundance and fruit symptoms,  
349 with a critical early-season window of strongest microbiota changes associated with a protective  
350 effect against epiphytic pathogen colonization. We inoculated seeds with *P. syringae* at the time of  
351 planting, but in real situations, the effect of cover crops on pathogen populations will be a function  
352 of temporal variation in seed and soil pathogen and microbiota reservoirs.

353 We found that both Rye and Chemically-Terminated Rye Cover Cropping treatments induced a  
354 strong shift in the squash phyllosphere microbiota, leading to a distinct community composition in  
355 comparison with Bare Soil and Plastic Cover treatments. The largest difference in leaf bacterial  
356 community composition associated with rye cover crop was observed early in the growing season.  
357 Copeland et al. (2015) reported homogenisation of community structure over time; early in the  
358 growing season, leaf microbiota was more diverse and soil was a strong driver of phyllosphere  
359 microbiome. Moreover, shifts in microbial community composition are likely driven by changes in  
360 environmental conditions as well as shifts in sources of bacterial migration to the phyllosphere.  
361 Cover cropping can directly modify soil abiotic properties such as temperature and moisture and  
362 chemical properties (50). Cover cropping also likely influences bacterial dispersal sources both by  
363 promoting colonization by bacteria living on the cover crops themselves, as well as through their  
364 effects on dispersal from different potential sources such as soils (51), water splash (52) and insects

365 (53,54). Taken together, we hypothesize that such local environmental shifts modify bacterial  
366 migration to the phyllosphere early in the growing season.

367 In addition to the effects of cover cropping on phyllosphere microbial communities, cover cropping  
368 treatments also likely influenced environmental conditions, which may explain part of their  
369 protective effects against *P. syringae*. Cover crops influence humidity and temperature (10). We  
370 observed that soil moisture and temperature varied among cover cropping treatments; soil moisture  
371 was higher under rye cover crops and plastic cover relative to bare soils, and temperatures were  
372 elevated under plastic cover relative to other treatments (Maglione et al., personal communication).  
373 Rye is also known to have allelopathic properties (55), which are also known to influence soil  
374 microbiota (56). Moreover, rye degradation can lead to decreases in soil pH (57) and improve weed  
375 control (58). All of these effects of cover cropping on the abiotic and biotic environment could  
376 influence early pathogen development, and interact with shifts in phyllosphere microbiota to  
377 amplify the potential protective effects of cover crops.

378 Previous studies have reported a protective effect against pathogens by phyllosphere microbial  
379 diversity *per se* (59), for example where increasing *Sphingomonas* diversity on leaves increased  
380 protection against *P. syringae* (21). In our study, there was not strong evidence for an effect of  
381 alpha diversity on its own to explain the protective effect of cover cropping against *P. syringae*;  
382 there were no overall differences in alpha diversity of phyllosphere bacteria among cover cropping  
383 treatments, although rye cover cropping did increase diversity in the early season. To properly test  
384 for a protective effect of phyllosphere diversity against *P. syringae*, future studies that directly  
385 manipulate diversity while keeping other factors constant will be required, but our results suggest  
386 that it was the composition of bacterial communities and not the diversity of the community *per se*  
387 that could explain the protective effects of cover cropping treatments.

388 Our results support the hypothesis that rye cover crops could protect against *P. syringae* by  
389 promoting the establishment of potential competitors or plant growth promoting bacteria (PGPB)



390 on the leaf surface. Rye cover cropping led to increases in the abundance of numerous bacterial  
391 phyllosphere taxa (60). This included several ASVs belonging to the genus *Sphingomonas*, which  
392 were more abundant with rye cover cropping, especially early in the growing season. Previous  
393 studies have demonstrated that *Sphingomonas* strains protect *Arabidopsis* against *P. syringae* in a  
394 controlled environment (21). Our findings provide field-based evidence suggestive that the  
395 *Sphingomonas* clade is a potential PGPB. We also found many other taxa preferentially associated  
396 with squash under rye cover cropping treatments, including ASVs belonging to the genus  
397 *Methylobacterium* that is a phyllosphere-associated clade (61) known to be an important PGPB in  
398 agriculture (62), and ASVs belonging to the genus *Pseudomonas*, which has been shown to be an  
399 antagonist of the pathogens *Erwinia* (63), Tobacco Necrosis Virus (64), and *Botrytis cinerea* (65).  
400 Thus, rye cover crops appear to favor the establishment of plant beneficial bacteria in the  
401 phyllosphere. The potentially beneficial bacterial ASVs associated with rye cover crops that we  
402 have identified are candidates for exploration of microbiome engineering approaches to directly  
403 inoculate protective bacterial strains to protect crops against pathogens (66).

#### 404 Conclusion

405 In conclusion, here we have shown that rye cover cropping is a sustainable agriculture practise that  
406 protects squash against the pathogen *P. syringae*. We have also provided evidence of a strong effect  
407 of rye cover crops on bacterial communities of the squash phyllosphere. Leaf microbial  
408 communities shifts as well as protective effects against *P. syringae* epiphytic development were  
409 more striking early in the growing season, during the crucial period of early plant growth and leaf  
410 colonization by *P. syringae*. We identified numerous bacterial ASVs belonging to the genera  
411 *Sphingomonas*, *Methylobacterium* and *Pseudomonas* that were promoted by rye cover crops. Thus,  
412 cover crops offer a means of sustainable management of bacterial pathogens and a reservoir of  
413 potential biocontrol agents. Open questions that remain include understanding the sources of the  
414 bacterial populations that were promoted by cover cropping; did they colonize the phyllosphere

415 directly from the rye cover crop, or did cover cropping indirectly select for beneficial bacteria by  
416 altering environmental conditions? To our knowledge, this is the first study to investigate how  
417 cover cropping practices impact phyllosphere bacterial communities, and our results show that rye  
418 cover cropping is a very promising sustainable agriculture practise that protect squash against  
419 pathogens and is potentially mediated by shifts in phyllosphere microbial communities.

## 420 **Availability of data and materials**

421 The demultiplexed sequence data have been deposited as sequences read archive under the  
422 BioProject: [PRJNA705113](#). The scripts used to perform analyses for the current study are available  
423 in a GitHub repository: [https://github.com/RemiMaglione/Science-](https://github.com/RemiMaglione/Science-Communication/tree/main/Article/cover-crop-squash-phyllosphere-microbiota-2021)  
424 [Communication/tree/main/Article/cover-crop-squash-phyllosphere-microbiota-2021](https://github.com/RemiMaglione/Science-Communication/tree/main/Article/cover-crop-squash-phyllosphere-microbiota-2021)

## 425 **Acknowledgements**

426 We thank Katherine Bisailon, Pierre-Olivier Hebert and Jean-Baptiste Leducq for their help in the  
427 field, in the lab, with analysis and for discussions.

## 428 **Funding**

429 The funding for this project was provided by Agriculture and Agri-Food Canada R&D Grant  
430 (Project J-001235 and J-001785; (VT, ML, MCio, and SWK), and by a NSERC Discovery Grant  
431 (SWK) and Canada Research Chair (SWK).

432 **References**

- 433 1. Fawell J, Nieuwenhuijsen MJ. Contaminants in drinking water Environmental pollution and  
434 health. *Br Med Bull.* 2003 Dec 1;68(1):199–208.
- 435 2. LU Y-C, WATKINS KB, TEASDALE JR, ABDUL-BAKI AA. Cover Crops in Sustainable  
436 Food Production. *Food Rev Int.* 2000 mai;16(2):121–57.
- 437 3. Fawcett J, Sievers J, Roush W, Lang B. On-Farm Cover Crop Trials. 2015 [cited 2017 Jun  
438 20]; Available from: [http://lib.dr.iastate.edu/farms\\_reports/2258](http://lib.dr.iastate.edu/farms_reports/2258)
- 439 4. Fawcett J, Mitchell T, Rogers J, Rossiter L. On-Farm Cover Crop Trials. *Farm Prog Rep.*  
440 2017;2016(1):113.
- 441 5. Stirzaker RJ, White I. Amelioration of soil compaction by a cover-crop for no-tillage lettuce  
442 production. *Aust J Agric Res.* 1995 May 1;46(3):553–68.
- 443 6. Teasdale JR. Contribution of Cover Crops to Weed Management in Sustainable Agricultural  
444 Systems. *J Prod Agric.* 1996 12/01;9(4):475–9.
- 445 7. Hooks CRR, Wang K-H, Ploeg A, McSorley R. Using marigold (*Tagetes* spp.) as a cover  
446 crop to protect crops from plant-parasitic nematodes. *Appl Soil Ecol.* 2010 Nov;46(3):307–  
447 20.
- 448 8. Dabney SM, Delgado JA, Reeves DW. USING WINTER COVER CROPS TO IMPROVE  
449 SOIL AND WATER QUALITY. *Commun Soil Sci Plant Anal* [Internet]. 2007 Feb 5 [cited  
450 2017 Oct 10]; Available from:  
451 [http://www.tandfonline.com.proxy.bibliotheques.uqam.ca/2048/doi/abs/10.1081/CSS-](http://www.tandfonline.com.proxy.bibliotheques.uqam.ca/2048/doi/abs/10.1081/CSS-100104110)  
452 100104110
- 453 9. Hall JK, Hartwig NL, Hoffman LD. Cyanazine Losses in Runoff from No-Tillage Corn in  
454 “Living” and Dead Mulches vs. Unmulched, Conventional Tillage. *J Environ Qual.*  
455 1984;13(1):105–10.
- 456 10. Teasdale JR, Mohler CL. Light Transmittance, Soil Temperature, and Soil Moisture under  
457 Residue of Hairy Vetch and Rye. *Agron J.* 1993;85(3):673–80.
- 458 11. Hartman K, van der Heijden MGA, Wittwer RA, Banerjee S, Walser J-C, Schlaeppi K.  
459 Cropping practices manipulate abundance patterns of root and soil microbiome members  
460 paving the way to smart farming. *Microbiome.* 2018 Jan 16;6(1):14.
- 461 12. Lindow SE, Brandl MT. Microbiology of the Phyllosphere. *Appl Environ Microbiol.* 2003  
462 Apr 1;69(4):1875–83.
- 463 13. Abanda-Nkwatt D, Krimm U, Schreiber L, Schwab W. Dual Antagonism of Aldehydes and  
464 Epiphytic Bacteria from Strawberry Leaf Surfaces against the Pathogenic Fungus *Botrytis*  
465 *cinerea* in vitro. *BioControl.* 2006 Jun 1;51(3):279–91.
- 466 14. Ritpitakphong U, Falquet L, Vimoltust A, Berger A, Métraux J-P, L’Haridon F. The  
467 microbiome of the leaf surface of *Arabidopsis* protects against a fungal pathogen. *New*  
468 *Phytol.* 2016 mai;210(3):1033–43.

- 469 15. Savary S, Willocquet L, Pethybridge SJ, Esker P, McRoberts N, Nelson A. The global burden  
470 of pathogens and pests on major food crops. *Nat Ecol Evol.* 2019 Mar;3(3):430–9.
- 471 16. Oerke E-C. Crop losses to pests. *J Agric Sci.* 2006 Feb;144(1):31–43.
- 472 17. Hirano SS, Upper CD. Bacteria in the Leaf Ecosystem with Emphasis on *Pseudomonas*  
473 *syringae*—a Pathogen, Ice Nucleus, and Epiphyte. *Microbiol Mol Biol Rev.* 2000 Sep  
474 1;64(3):624–53.
- 475 18. Xin X-F, Kvitko B, He SY. *Pseudomonas syringae* : what it takes to be a pathogen. *Nat Rev*  
476 *Microbiol.* 2018 May;16(5):316–28.
- 477 19. Lindemann J, Arny DC, Upper CD. Epiphytic populations of *Pseudomonas syringae* pv.  
478 *syringae* on snap bean and nonhost plants and the incidence of bacterial brown spot disease  
479 in relation to cropping patterns. *Phytopathology.* 1984;74(11):1329–33.
- 480 20. Lindemann J, Suslow TV. Competition between ice nucleation-active wild type and ice  
481 nucleation-deficient deletion mutant strains of *Pseudomonas syringae* and *Pseudomonas*  
482 *fluorescens* biovar I and biological control of frost injury on strawberry blossoms.  
483 *Phytopathol USA* [Internet]. 1987 [cited 2020 Jun 12]; Available from:  
484 <https://agris.fao.org/agris-search/search.do?recordID=US8743068>
- 485 21. Innerebner G, Knief C, Vorholt JA. Protection of *Arabidopsis thaliana* against Leaf-  
486 Pathogenic *Pseudomonas syringae* by *Sphingomonas* Strains in a Controlled Model System.  
487 *Appl Environ Microbiol.* 2011 May 15;77(10):3202–10.
- 488 22. Pieterse CMJ, Zamioudis C, Berendsen RL, Weller DM, Van Wees SCM, Bakker PAHM.  
489 Induced Systemic Resistance by Beneficial Microbes. *Annu Rev Phytopathol.*  
490 2014;52(1):347–75.
- 491 23. Van Wees SC, Van der Ent S, Pieterse CM. Plant immune responses triggered by beneficial  
492 microbes. *Curr Opin Plant Biol.* 2008 août;11(4):443–8.
- 493 24. Hossain MdM, Sultana F, Kubota M, Hyakumachi M. Differential inducible defense  
494 mechanisms against bacterial speck pathogen in *Arabidopsis thaliana* by plant-growth-  
495 promoting-fungus *Penicillium* sp. GP16-2 and its cell free filtrate. *Plant Soil.* 2008 Mar  
496 1;304(1):227–39.
- 497 25. Bender CL, Cooksey DA. Indigenous plasmids in *Pseudomonas syringae* pv. tomato:  
498 conjugative transfer and role in copper resistance. *J Bacteriol.* 1986 Feb 1;165(2):534–41.
- 499 26. Abawi GS, Widmer TL. Impact of soil health management practices on soilborne pathogens,  
500 nematodes and root diseases of vegetable crops. *Appl Soil Ecol.* 2000 Aug 1;15(1):37–47.
- 501 27. Collins HP, Alva A, Boydston RA, Cochran RL, Hamm PB, McGuire A, et al. Soil microbial,  
502 fungal, and nematode responses to soil fumigation and cover crops under potato production.  
503 *Biol Fertil Soils.* 2006 Feb 1;42(3):247–57.
- 504 28. Bakker MG, Acharya J, Moorman TB, Robertson AE, Kaspar TC. The Potential for Cereal  
505 Rye Cover Crops to Host Corn Seedling Pathogens. *Phytopathology*®. 2016 Feb  
506 29;106(6):591–601.

- 507 29. Chelius MK, Triplett EW. The Diversity of Archaea and Bacteria in Association with the  
508 Roots of *Zea mays* L. *Microb Ecol.* 2001 Apr;41(3):252–63.
- 509 30. Redford AJ, Bowers RM, Knight R, Linhart Y, Fierer N. The ecology of the phyllosphere:  
510 geographic and phylogenetic variability in the distribution of bacteria on tree leaves. *Environ*  
511 *Microbiol.* 2010;12(11):2885–93.
- 512 31. Bushnell B. BBTools software package. URL [Https://sourceforge.net/projects/bbmap](https://sourceforge.net/projects/bbmap). 2014;
- 513 32. Martin M. Cutadapt removes adapter sequences from high-throughput sequencing reads.  
514 *EMBnet.journal.* 2011 May 2;17(1):10–2.
- 515 33. Callahan BJ, McMurdie PJ, Rosen MJ, Han AW, Johnson AJA, Holmes SP. DADA2: High-  
516 resolution sample inference from Illumina amplicon data. *Nat Methods.* 2016 Jul;13(7):581–  
517 3.
- 518 34. Oksanen J, Kindt R, Legendre P, O’Hara B, Stevens MHH, Oksanen MJ, et al. The vegan  
519 package. *Community Ecol Package.* 2007;10:631–7.
- 520 35. Team RC, others. R: A language and environment for statistical computing. Vienna, Austria;  
521 2013.
- 522 36. Wickham H. *ggplot2: elegant graphics for data analysis.* springer; 2016.
- 523 37. Quast C, Pruesse E, Yilmaz P, Gerken J, Schweer T, Yarza P, et al. The SILVA ribosomal  
524 RNA gene database project: improved data processing and web-based tools. *Nucleic Acids*  
525 *Res.* 2013 Jan 1;41(D1):D590–6.
- 526 38. Yilmaz P, Parfrey LW, Yarza P, Gerken J, Pruesse E, Quast C, et al. The SILVA and “All-  
527 species Living Tree Project (LTP)” taxonomic frameworks. *Nucleic Acids Res.* 2014 Jan  
528 1;42(D1):D643–8.
- 529 39. Gloor GB, Macklaim JM, Pawlowsky-Glahn V, Egozcue JJ. Microbiome Datasets Are  
530 Compositional: And This Is Not Optional. *Front Microbiol* [Internet]. 2017 [cited 2020 Jun  
531 24];8. Available from: <https://www.frontiersin.org/articles/10.3389/fmicb.2017.02224/full>
- 532 40. McMurdie PJ, Holmes S. phyloseq: An R Package for Reproducible Interactive Analysis and  
533 Graphics of Microbiome Census Data. *PLOS ONE.* 2013 Apr 22;8(4):e61217.
- 534 41. Kembel SW, Cowan PD, Helmus MR, Cornwell WK, Morlon H, Ackerly DD, et al. Picante:  
535 R tools for integrating phylogenies and ecology. *Bioinformatics.* 2010 Jun 1;26(11):1463–4.
- 536 42. Haegeman B, Hamelin J, Moriarty J, Neal P, Dushoff J, Weitz JS. Robust estimation of  
537 microbial diversity in theory and in practice. *ISME J.* 2013 Jun;7(6):1092–101.
- 538 43. Bray JR, Curtis JT. An Ordination of the Upland Forest Communities of Southern Wisconsin.  
539 *Ecol Monogr.* 1957 Feb 1;27(4):325–49.
- 540 44. Lenth R, Singmann H, Love J, Buerkner P, Herve M. Emmeans: Estimated marginal means,  
541 aka least-squares means. R Package Version. 2018;1(1):3.

- 542 45. Love MI, Huber W, Anders S. Moderated estimation of fold change and dispersion for RNA-  
543 seq data with DESeq2. *Genome Biol* [Internet]. 2014 [cited 2017 Aug 16];15(12). Available  
544 from: <http://www.ncbi.nlm.nih.gov/pmc/articles/PMC4302049/>
- 545 46. Gloor G. CoDaSeq: Analyzing HTS using compositional data analysis. *F1000Research*.  
546 2016;5.
- 547 47. Palarea-Albaladejo J, Martín-Fernández JA. zCompositions—R package for multivariate  
548 imputation of left-censored data under a compositional approach. *Chemom Intell Lab Syst*.  
549 2015;143:85–96.
- 550 48. Misas-Villamil JC, Kolodziejek I, Crabill E, Kaschani F, Niessen S, Shindo T, et al.  
551 *Pseudomonas syringae* pv. *syringae* Uses Proteasome Inhibitor Syringolin A to Colonize from  
552 Wound Infection Sites. *PLOS Pathog*. 2013 Mar 28;9(3):e1003281.
- 553 49. Copeland JK, Yuan L, Layeghifard M, Wang PW, Guttman DS. Seasonal Community  
554 Succession of the Phyllosphere Microbiome. *Mol Plant Microbe Interact*. 2015 Feb  
555 13;28(3):274–85.
- 556 50. Villamil MB, Bollero GA, Darmody RG, Simmons FW, Bullock DG. No-Till Corn/Soybean  
557 Systems Including Winter Cover Crops. *Soil Sci Soc Am J*. 2006;70(6):1936–44.
- 558 51. Bodenhausen N, Horton MW, Bergelson J. Bacterial Communities Associated with the  
559 Leaves and the Roots of *Arabidopsis thaliana*. *PLOS ONE*. 2013 févr;8(2):e56329.
- 560 52. Butterworth J, McCartney HA. The dispersal of bacteria from leaf surfaces by water splash.  
561 *J Appl Bacteriol*. 1991;71(6):484–96.
- 562 53. Manirajan BA, Ratering S, Rusch V, Schwiertz A, Geissler-Plaum R, Cardinale M, et al.  
563 Bacterial microbiota associated with flower pollen is influenced by pollination type, and  
564 shows a high degree of diversity and species-specificity. *Environ Microbiol*.  
565 2016;18(12):5161–74.
- 566 54. Vega C de, Herrera CM. Microorganisms transported by ants induce changes in floral nectar  
567 composition of an ant-pollinated plant. *Am J Bot*. 2013;100(4):792–800.
- 568 55. Schulz M, Marocco A, Tabaglio V, Macias FA, Molinillo JMG. Benzoxazinoids in Rye  
569 Allelopathy - From Discovery to Application in Sustainable Weed Control and Organic  
570 Farming. *J Chem Ecol*. 2013 Feb 1;39(2):154–74.
- 571 56. Hu L, Robert CAM, Cadot S, Zhang X, Ye M, Li B, et al. Root exudate metabolites drive  
572 plant-soil feedbacks on growth and defense by shaping the rhizosphere microbiota. *Nat*  
573 *Commun*. 2018 Jul 16;9(1):2738.
- 574 57. Abdollahi L, Munkholm LJ. Tillage System and Cover Crop Effects on Soil Quality: I.  
575 Chemical, Mechanical, and Biological Properties. *Soil Sci Soc Am J*. 2014;78(1):262–70.
- 576 58. Barnes JP, Putnam AR. Rye residues contribute weed suppression in no-tillage cropping  
577 systems. *J Chem Ecol*. 1983 Aug 1;9(8):1045–57.

- 578 59. Keesing F, Belden LK, Daszak P, Dobson A, Harvell CD, Holt RD, et al. Impacts of  
579 biodiversity on the emergence and transmission of infectious diseases. *Nature*. 2010  
580 Dec;468(7324):647–52.
- 581 60. Filippova V, Kruglov YV, Andronov E, others. Phylogenetic structure of community of  
582 procarionts of soddy-podzolic soil under the cover of winter rye is not influenced by  
583 agrotechnics. 2018 Jun 12;
- 584 61. Delmotte N, Knief C, Chaffron S, Innerebner G, Roschitzki B, Schlapbach R, et al.  
585 Community proteogenomics reveals insights into the physiology of phyllosphere bacteria.  
586 *Proc Natl Acad Sci*. 2009 Sep 22;106(38):16428–33.
- 587 62. Madhaiyan M, Suresh Reddy BV, Anandham R, Senthilkumar M, Poonguzhali S, Sundaram  
588 SP, et al. Plant Growth–Promoting Methylobacterium Induces Defense Responses in  
589 Groundnut (*Arachis hypogaea* L.) Compared with Rot Pathogens. *Curr Microbiol*. 2006 Oct  
590 1;53(4):270–6.
- 591 63. Cabrefiga Olamendi J, Bonaterra i Carreras A, Montesinos Seguí E. Mechanisms of  
592 antagonism of *Pseudomonas fluorescens* EPS62e against *Erwinia amylovora*, the causal agent  
593 of fire blight. 2007 [cited 2020 Jun 21]; Available from: [https://dugi-](https://dugi-doc.udg.edu/handle/10256/7763)  
594 [doc.udg.edu/handle/10256/7763](https://dugi-doc.udg.edu/handle/10256/7763)
- 595 64. Maurhofer M, Reimann C, Schmidli-Sacherer P, Heeb S, Haas D, Défago G. Salicylic Acid  
596 Biosynthetic Genes Expressed in *Pseudomonas fluorescens* Strain P3 Improve the Induction  
597 of Systemic Resistance in Tobacco Against Tobacco Necrosis Virus. *Phytopathology*®. 1998  
598 Jul 1;88(7):678–84.
- 599 65. De Meyer G, Höfte M. Salicylic Acid Produced by the Rhizobacterium *Pseudomonas*  
600 *aeruginosa* 7NSK2 Induces Resistance to Leaf Infection by *Botrytis cinerea* on Bean.  
601 *Phytopathology*®. 1997 Jun 1;87(6):588–93.
- 602 66. Quiza L, St-Arnaud M, Yergeau E. Harnessing phytomicrobiome signaling for rhizosphere  
603 microbiome engineering. *Front Plant Sci* [Internet]. 2015 [cited 2017 Sep 11];6. Available  
604 from: <http://journal.frontiersin.org/article/10.3389/fpls.2015.00507/full>
- 605

606 **Figures and Tables**

607 **Table 1: Proportion of squash fruit (mean +/- standard deviation) with no *P. syringae***  
608 **symptoms and marketable fruits with no damage for the two-growing seasons 2016 and 2017.**  
609 Differences among treatments were tested using Tukey's honestly significant difference (HSD)  
610 test, based on a generalized mixed model with General Linear Hypotheses provided by glht function  
611 of multcomp package. Treatments that do not share a letter were significantly different according  
612 to the Tukey HSD test ( $p < 0.05$ ). Since random effect of blocking variable for *Proportion of*  
613 *marketable squash fruit with no damages for 2016 growing season* was not significant, TukeyHSD  
614 has been evaluated this year on generalized linear model with TukeyHSD function of stats package

| <b>Year</b>                                                               | <b><i>Plastic Cover</i></b> | <b><i>Rye Cover Crop</i></b> | <b><i>Chemically-Terminated Rye Cover Crop</i></b> | <b><i>Bare Soil</i></b> |
|---------------------------------------------------------------------------|-----------------------------|------------------------------|----------------------------------------------------|-------------------------|
| <b>Proportion of squash fruit without <i>P. syringae</i> symptoms (%)</b> |                             |                              |                                                    |                         |
| <i>2016</i>                                                               | 56.8 ± 6.7 <b>bc</b>        | 63.2 ± 7.7 <b>ab</b>         | 59.7 ± 10.4 <b>bc</b>                              | 49.2 ± 9.3 <b>c</b>     |
| <i>2017</i>                                                               | 79.3 ± 8.8 <b>bc</b>        | 90.8 ± 6.9 <b>bc</b>         | 87 ± 8.3 <b>ab</b>                                 | 79.8 ± 8.4 <b>c</b>     |
| <b>Proportion of marketable squash fruit with no damages (%)</b>          |                             |                              |                                                    |                         |
| <i>2016</i>                                                               | 79.5 ± 5.4 <b>c</b>         | 87.5 ± 5.8 <b>ab</b>         | 81.3 ± 3.4 <b>bc</b>                               | 74.5 ± 7.3 <b>c</b>     |
| <i>2017</i>                                                               | 91.17 ± 7.1 <b>c</b>        | 95.5 ± 3.4 <b>ab</b>         | 94.2 ± 3 <b>bc</b>                                 | 89.3 ± 3 <b>c</b>       |

615



616 2016

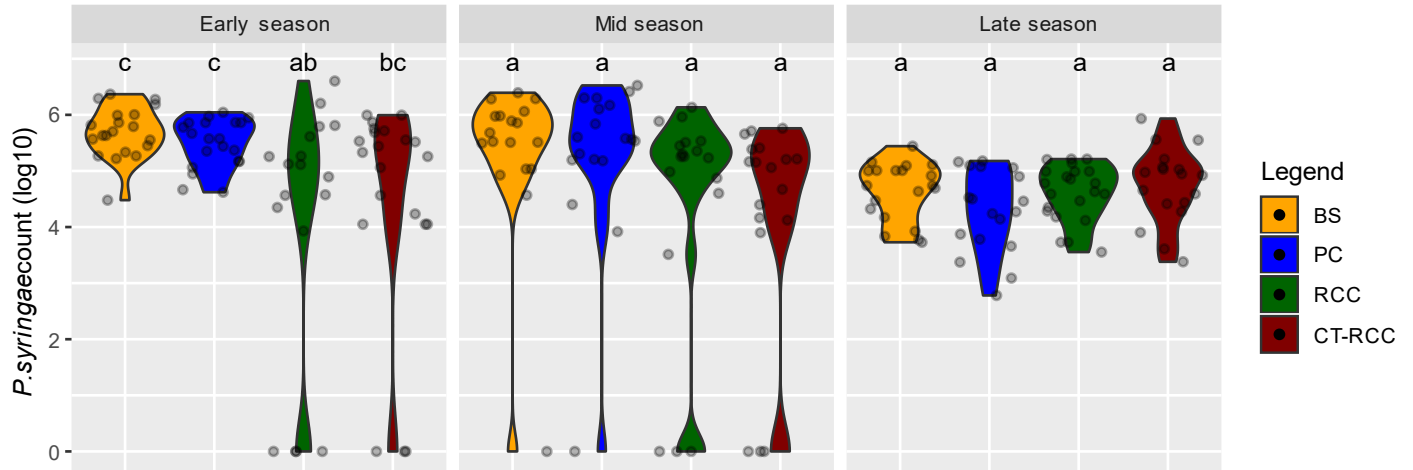

617 2017

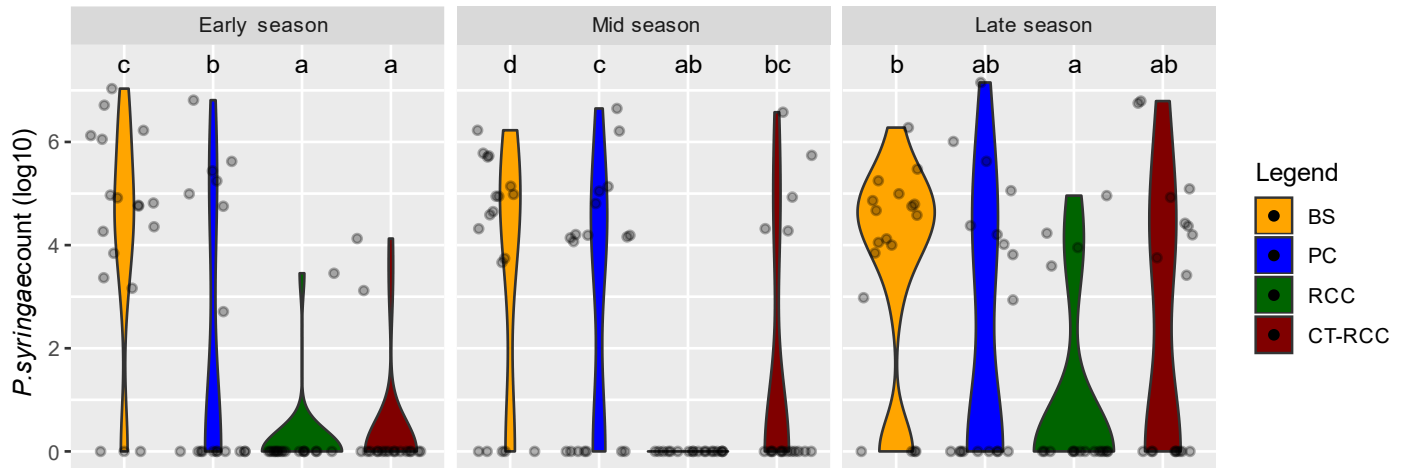

618 **Figure 1: *P. syringae* population of squash leaves for different cover cropping practices**  
619 **during 2016 and 2017.** Squash pathogen population sizes were estimated based on CFU count  
620 from bacterial culture of each leaves sample retrieved from 4 cropping treatments: Bare Soil (BS),  
621 Plastic Cover (PC), Rye Cover Crop (RCC) and Chemically Terminated Rye Cover Crop (CT-  
622 RCC). Different letters represent significantly different treatments ( $p < 0.05$ ) from a post-hoc test  
623 (TukeyHSD) of a linear model (*P. syringae* as a function of treatment) in 2016 or a linear mixed  
624 model (*P. syringae* as a function of treatment (fixed effect) and block (random effect) in 2017

625

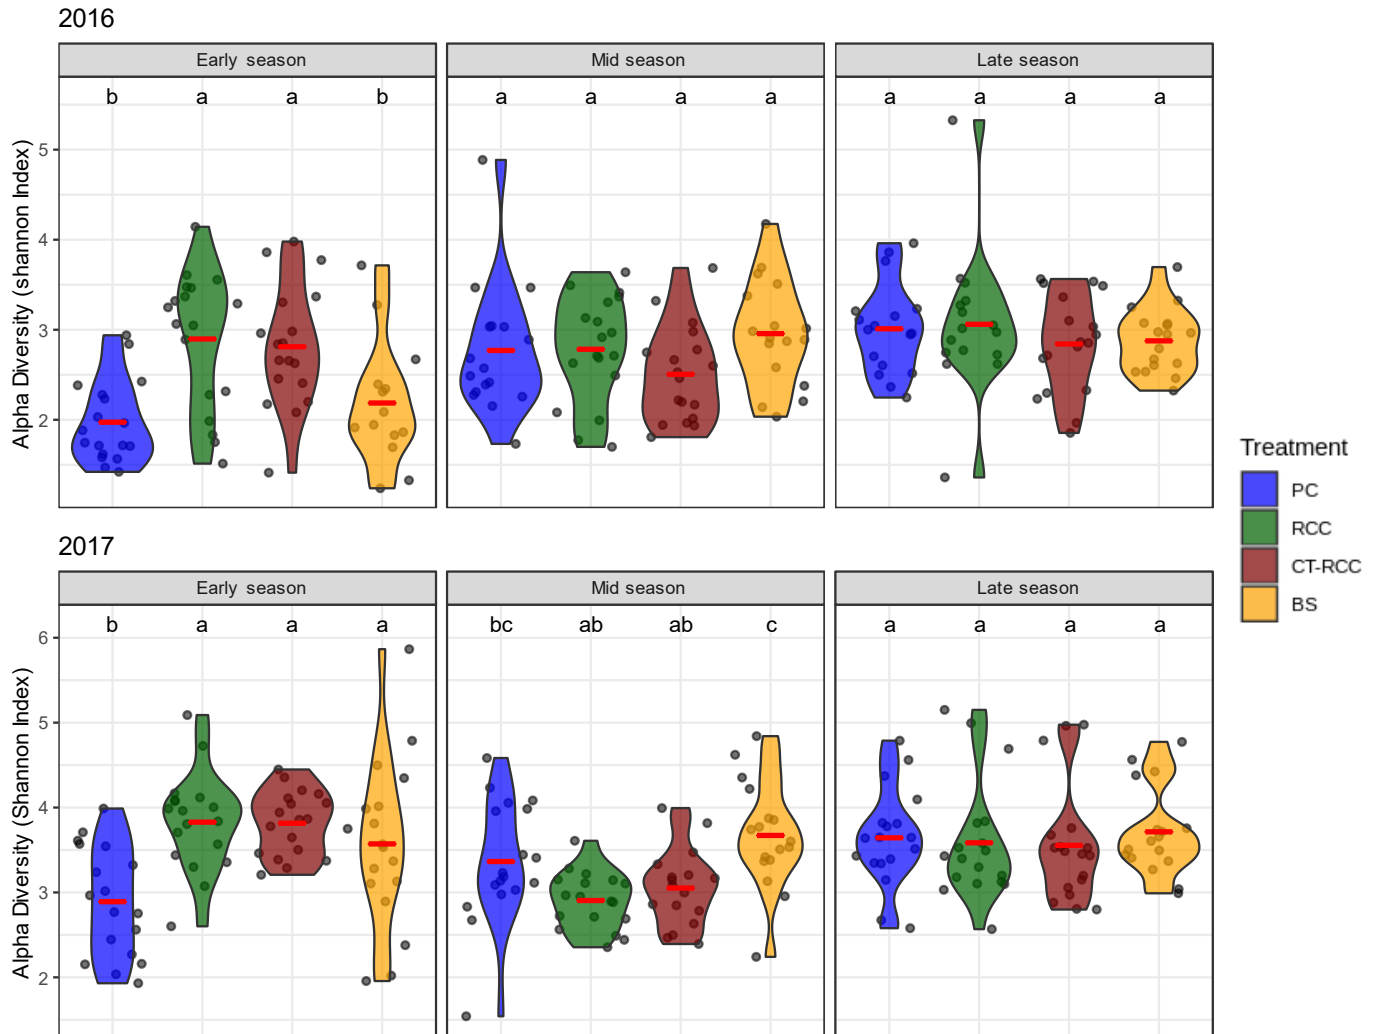

626 **Figure 2: Violin plot of alpha Diversity (Shannon index) for each treatment and each**  
627 **sampling date during the growing season of years 2016 and 2017.** Horizontal red line represents  
628 the mean distribution. Blue: PC (Plastic Cover), green: RCC (Rye Cover Crop), red: CT-RCC  
629 (Chemically Terminated Rye Cover Crop) and yellow: BS (Bare Soil). Different letter represents  
630 significantly different treatments ( $p < 0.05$ ) from a post-hoc test (TukeyHSD) of a linear model  
631 (alpha diversity as a function of treatment)

632

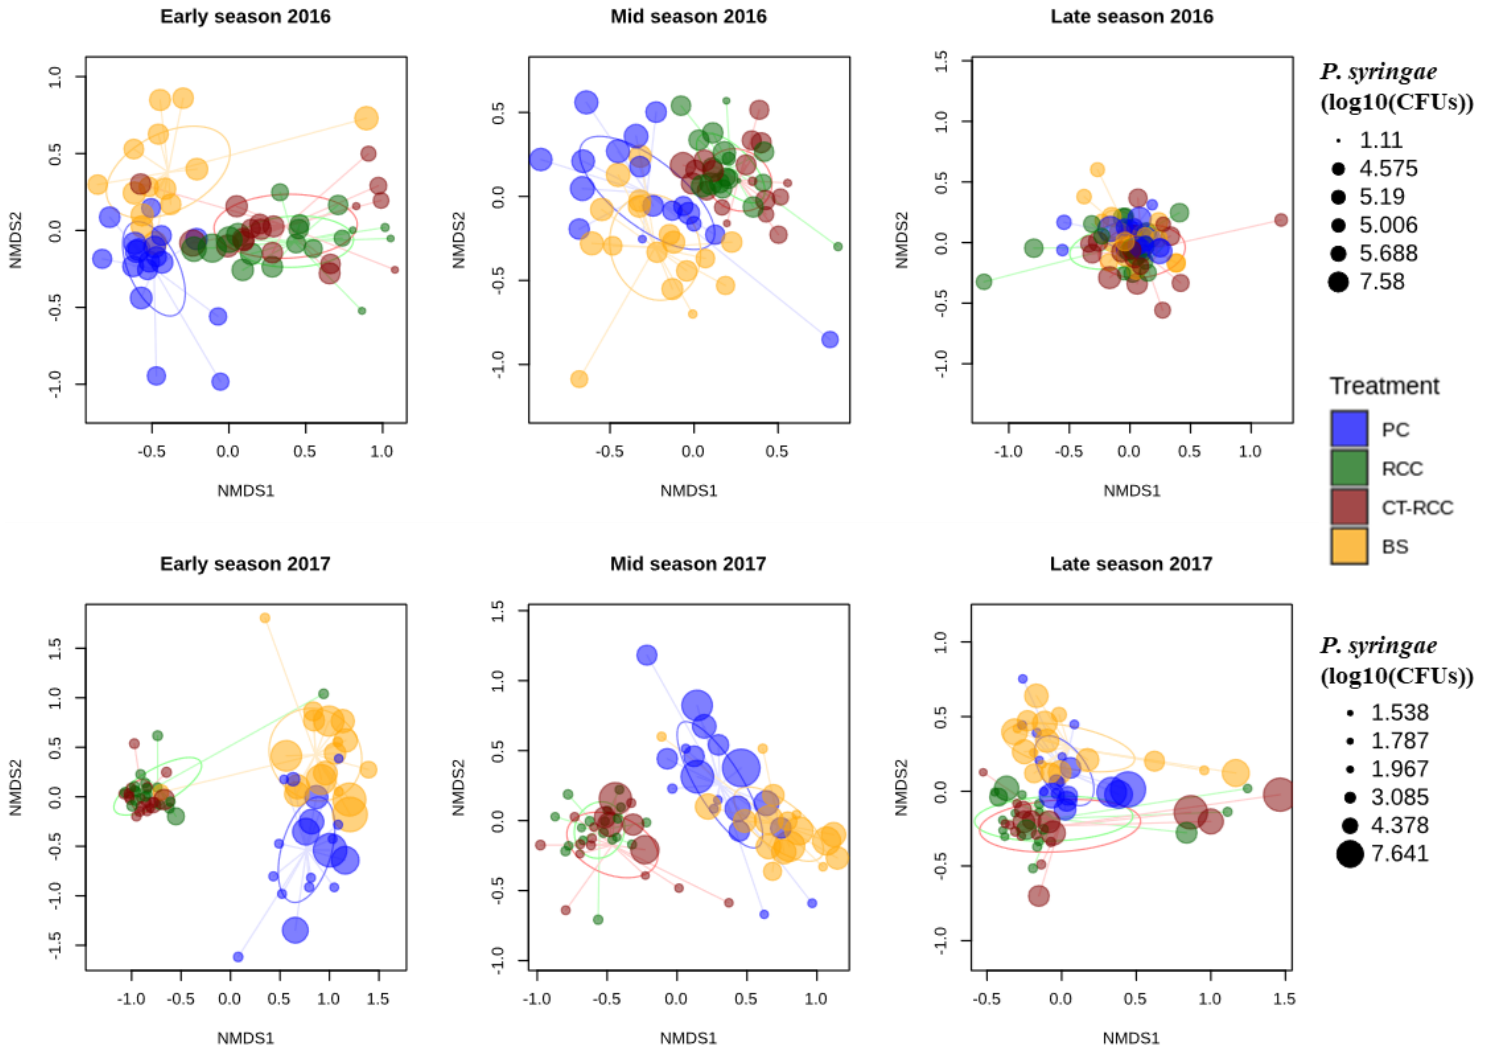

633 **Figure 3: Non-metric multidimensional scaling (NMDS) ordination of bacterial community**  
634 **composition in squash phyllosphere samples from different cover cropping treatments in**  
635 **2016 and 2017.** Each point represents a phyllosphere community; symbol size indicates the  
636 abundance of *P. syringae* colony forming units (log<sub>10</sub>(CFUs)) in that sample; colors indicate the  
637 cover cropping treatment: blue: PC (Plastic Cover), green: RCC (Rye Cover Crop), red: CT-RCC  
638 (Chemically Terminated Rye Cover Crop) and yellow: BS (Bare Soil).

639

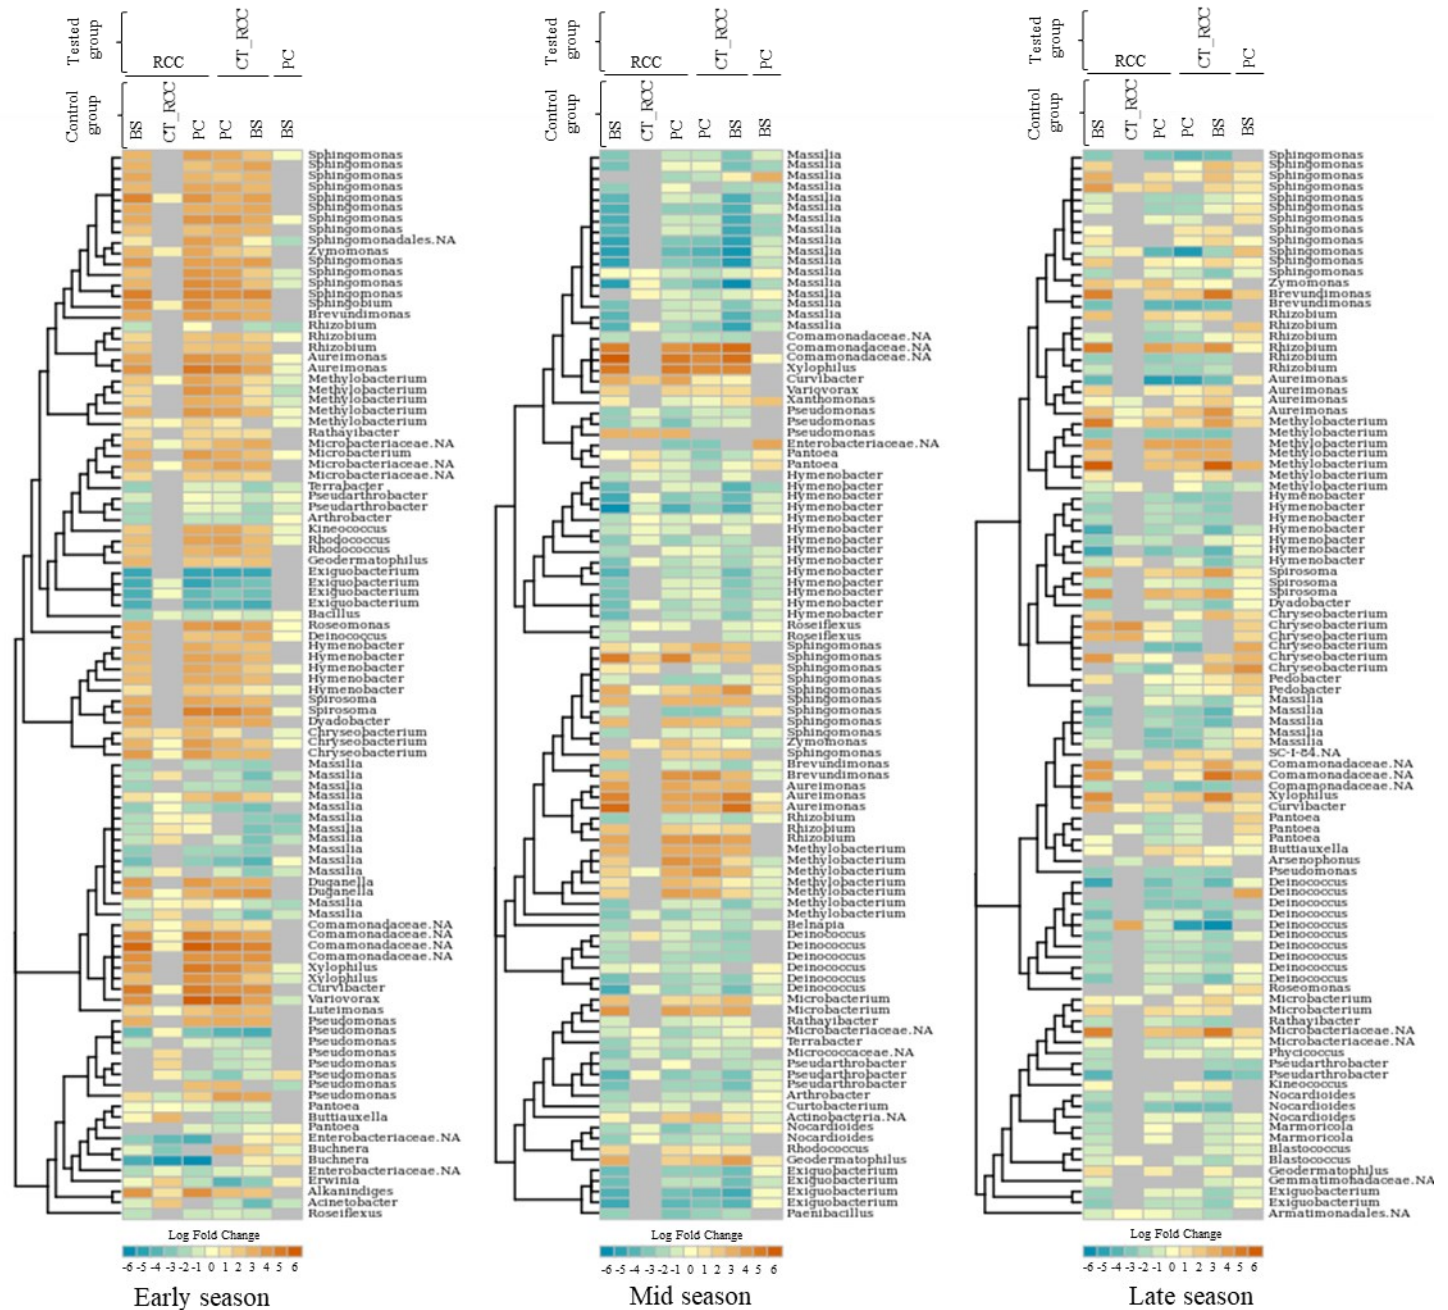

640 **Figure 4: log<sub>2</sub>-fold change (LFC) heatmap of most differentially abundant ASV from DeSeq2**  
 641 **analysis for each sampling date of the 2017 samples.** For each panel, left track is the phylogenetic  
 642 tree from pynast alignment of ASVs sequence while right track is the corresponding taxonomic  
 643 name at the Genus rank. Each heatmap column is a different contrast between two treatment  
 644 mentioned in header as followed: above name is the “tested” treatment whereas the below one is  
 645 the “control” treatment meaning that a positive LFC value represent an ASV more abundant for the  
 646 tested treatment. Grey color represents no LFC for the ASV. Each number on the bottom LFC  
 647 colour scale represents a level of LFC. Tested treatment: PC (Plastic Cover), RCC (Rye Cover  
 648 Crop), CT-RCC (Chemically Terminated Rye Cover Crop) and yellow: BS (Bare Soil).
